# Supplementary material for: Membrane Order Effect on the Photoresponse of an Organic Transducer
Source: MDPI journal article supplement (doi:10.3390/membranes13050538), 2023-05-22
Supplement: s1 [file s1]

# SUPPORTING INFORMATION

## Membrane Order Effect onto the Photoresponse of Organic Transducer

Vito Vurro<sup>1†</sup>, Matteo Moschetta<sup>1†</sup>, Gaia Bondelli<sup>1,2†</sup>, Samim Sardar<sup>1</sup>, Arianna Magni<sup>1,2</sup>, Valentina Sesti<sup>1,3</sup>, Giuseppe M. Paternò<sup>1,2</sup>, Chiara Bertarelli<sup>1,3</sup>, Cosimo D'Andrea<sup>1,2</sup> and Guglielmo Lanzani<sup>1,2\*</sup>

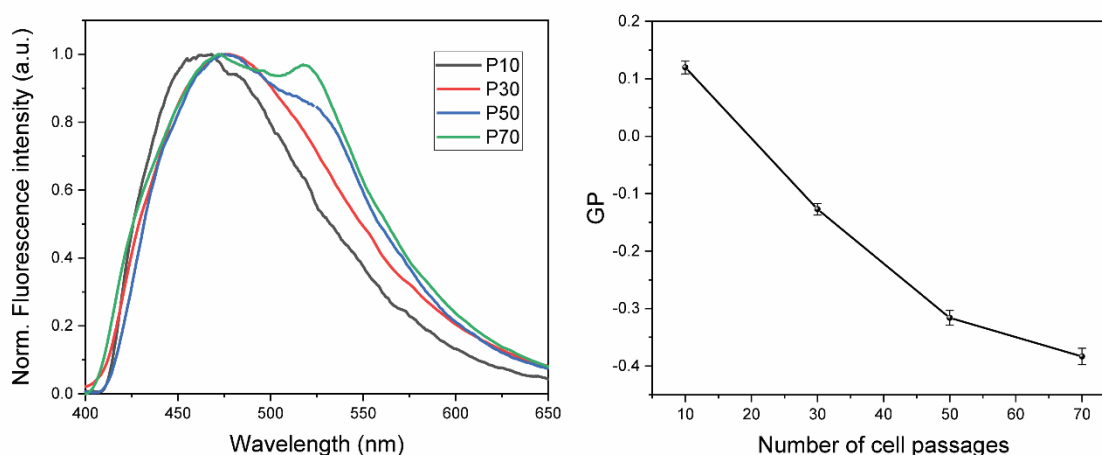

**Figure S1.** Laurdan Spectra evolution as a function of cell passage number. a) Laurdan emission spectra acquired in HEK-293T cells at a different passage number. b) Evolution of the extracted GP value as a function of cell passage number. Data are represented as mean  $\pm$  SD.

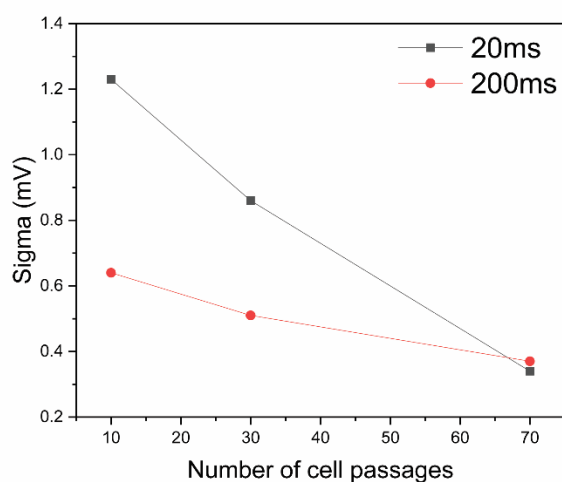

**Figure S2.** Standard deviation value of the cell membrane potential modulation as a function of the cell passage number. These values are reported as a results of 20ms (black line) and 200ms (red line) light pulses duration.

**Table S1.** Resulting values of the deconvolution process for 460nm component ( $I_B$ ) and its standard deviation ( $\sigma_B$ ) and for 510nm component ( $I_G$ ) and its standard deviation ( $\sigma_G$ ). GP and  $\sigma_{GP}$  value obtained by the previous parameters. All the values are extracted or calculated at different cell passage number.

|     | $I_B$ | $\sigma_B$ | $I_G$ | $\sigma_G$ | GP     | $\sigma_{GP}$ |
|-----|-------|------------|-------|------------|--------|---------------|
| P10 | 0,707 | 0,007      | 0,555 | 0,006      | 0,120  | 0,011         |
| P30 | 0,538 | 0,006      | 0,695 | 0,005      | -0,127 | 0,010         |
| P50 | 0,443 | 0,008      | 0,853 | 0,005      | -0,316 | 0,013         |
| P70 | 0,391 | 0,008      | 0,876 | 0,006      | -0,383 | 0,015         |

**Table S2.** Resulting values of the deconvolution process for 460nm component ( $I_B$ ) and its and for 510nm component ( $I_G$ ) obtained at 40°C.  $GP_{40^\circ}$  value was calculated by the previous parameters while  $GP_{20^\circ}$  was taken by Supporting Table 1.  $\Delta GP$  and  $\sigma_{\Delta G}$  was calculate as difference between GP calculated at 40°C and 22°C. All the values are extracted or calculated at different cell passage number.

|     | $I_B$ | $I_G$ | $GP_{40^\circ}$ | $GP_{22^\circ}$ | $\Delta GP$ | $\sigma_{\Delta GP}$ |
|-----|-------|-------|-----------------|-----------------|-------------|----------------------|
| P10 | 0,465 | 0,538 | -0,073          | 0,120           | -0,193      | 0,021                |
| P30 | 0,229 | 0,673 | -0,492          | -0,127          | 0,365       | 0,025                |
| P70 | 0,066 | 0,774 | -0,843          | -0,383          | 0,460       | 0,072                |

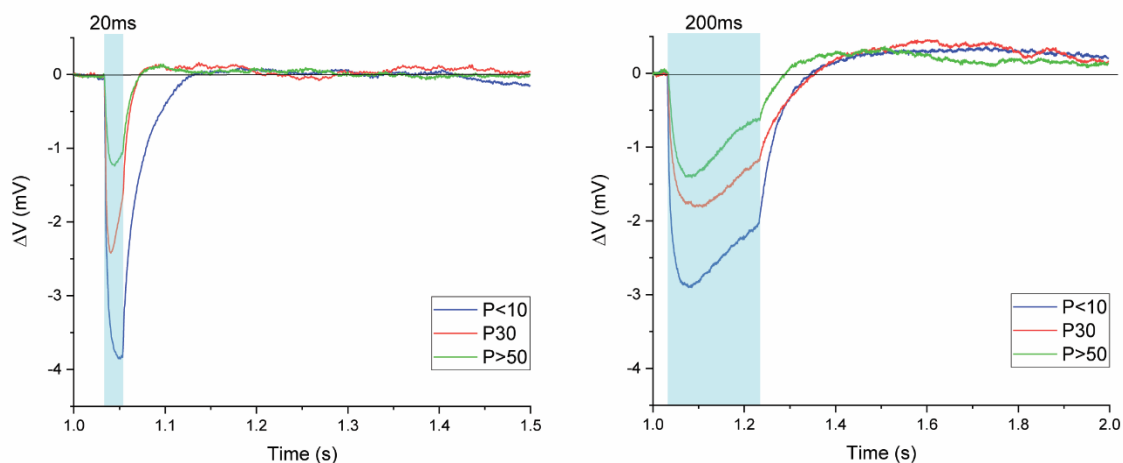

**Figure S3.** Representative traces of membrane potential hyperpolarization of Ziapin2-treated HEK-293T cells at increasing cell passages. Light stimulation (power density: 53mW/mm<sup>2</sup>) persists for both 20ms (left) and 200ms (right).
